# Supplementary material
Source: publisher site journal article supplement (https://www.dovepress.com/article/551113)
Supplement: Supplementary file 1 [file 551113%20Supplementary%20Table%201.docx]

**Supplementary Table 1** Dosimetric and Volume Parameters

| Target/Organ | Parameters | 72.6 Gy in 22 fractions (n=75), Median (IQR) | 66.0 Gy in 10 fractions (n=8), Median (IQR) |
| --- | --- | --- | --- |
| CTV | D95 (cGy) | 5406 (4663-7063) | 4782 (3503-5545) |
| D50 (cGy) | 7459 (7418-7497) | 6778 (6764-6802) |
| Average (cGy) | 7225 (7000-7426) | 6545 (6018-6636) |
| 100% dose coverage (%) | 80.22 (70.83-94.11) | 74.04 (62.67-84.36) |
| Volume (mL) | 465 (215-923) | 181 (72-302) |
| ITV | D95 (cGy) | 4604 (4468-6081) | 4069 (3365-5226) |
| D50 (cGy) | 7444 (7373-7476) | 6756 (6656-6801) |
| Average (cGy) | 7043 (6793-7271) | 6403 (5833-6529) |
| 100% dose coverage (%) | 72.28 (61.50-83.22) | 70.97 (52.35-79.99) |
| Volume (mL) | 646 (297-1112) | 299 (134-392) |
| Esophagus |  |  |  |
|  | Maximum dose (cGy) | 1681 (117-3469) | 475 (71-2849) |
| Gastrointestinal Tract | Maximum dose (cGy) | 4617 (4335-4687) | 3385 (981-3607) |
| Liver | Normal liver volume (mL) | 931 (771-1087) | 1163 (711-1303) |
| Unirradiated liver volume (mL) | 432 (332-533) | 677 (499-741) |

CTV, clinical target volume; ITV, internal target volume

Unirradiated liver volume: absolute liver volume receiving < 1 Gy
